# Supplementary material for: Rapeseed Morpho-Physio-Biochemical Responses to Drought Stress Induced by PEG-6000
Source: MDPI journal article supplement (doi:10.3390/agronomy12030579), 2022-02-26
Supplement: s1 [file s1]

**Table S1:** List of 24 cultivars examined under PEG-6000 induced drought stress.

| No. | Name           | Chinese Name | Abbreviation | Ecotype     | Origin                                                                                           |
|-----|----------------|--------------|--------------|-------------|--------------------------------------------------------------------------------------------------|
| V1  | Chuanyou 81    | 川油 81        | CY 81        | Semi-winter | Crop Research Institute, Sichuan Academy of Agricultural Sciences.                               |
| V2  | Yanyouza 3     | 盐油杂 3 号      | YYZ 3        | Semi-winter | Jiangsu Coastal Area Agricultural Science Research Institute, Yancheng.                          |
| V3  | Yuyou 28       | 渝油 28        | YY 28        | Semi-winter | Southwest University.                                                                            |
| V4  | Chuanyou 36    | 川油 36        | CY 36        | Semi-winter | Crop Research Institute, Sichuan Academy of Agricultural Sciences.                               |
| V5  | Jinyouza 158   | 金油杂 158      | JYZ 158      | Semi-winter | Huazhong Agricultural University.                                                                |
| V6  | Zheyou 50      | 浙油 50        | ZY 50        | Semi-winter | Institute of crop and nuclear technology utilization, Zhejiang Academy of Agricultural Sciences. |
| V7  | Qinyou 33      | 秦优 33        | QY 33        | Semi-winter | Shaanxi hybrid rape Research Center.                                                             |
| V8  | Zheyou 51      | 浙油 51        | ZY 51        | Semi-winter | Institute of crop and nuclear technology utilization, Zhejiang Academy of Agricultural Sciences. |
| V9  | Xiangzayou 518 | 湘杂油 518      | XZY 518      | Semi-winter | Hunan Agricultural University, Changsha Jintian Seed Industry.                                   |
| V10 | Guohao oil 8   | 国豪油 8 号      | GHY 8        | Semi-winter | Sichuan Guohao Seed Industry.                                                                    |
| V11 | Zheyouza 108   | 浙油杂 108      | ZYZ 108      | Semi-winter | Institute of crop and nuclear technology utilization, Zhejiang Academy of Agricultural Sciences  |
| V12 | Ningza1838     | 宁杂 1838      | NZ 1838      | Semi-winter | Institute of economic crops, Jiangsu Academy of Agricultural Sciences.                           |
| V13 | Xiangzayou 553 | 湘杂油 553      | XZY 553      | Semi-winter | Hunan Agricultural University, Changsha Jintian Seed Industry.                                   |
| V14 | Yangyou 9      | 扬油 9 号       | YY 9         | Semi-winter | Jiangsu Xiahe Agricultural Research Institute.                                                   |
| V15 | Huayouza 62    | 华油杂 62       | HYZ 62       | Semi-winter | Huazhong Agricultural University.                                                                |
| V16 | Qingyou 3      | 庆油 3 号       | QY 3         | Semi-winter | Chongqing Academy of Agricultural Sciences, Chongqing Zhongyi Seed Industry.                     |
| V17 | QinYou 7       | 秦优 7 号       | QY 7         | Semi-winter | Shaanxi Hybrid Rapeseed Research Center.                                                         |
| V18 | Zhongshuang 11 | 中双 11 号      | ZS 11        | Semi-winter | Institute of oil crops, Chinese Academy of Agricultural Sciences.                                |
| V19 | Yangguang 2009 | 阳光 2009      | YG 2009      | Semi-winter | Institute of oil crops, Chinese Academy of Agricultural Sciences.                                |

|     |               |         |         |             |                                                    |
|-----|---------------|---------|---------|-------------|----------------------------------------------------|
| V20 | Huayouza 72   | 华油杂 72  | HYZ 72  | Semi-winter | Huazhong Agricultural University.                  |
| V21 | Qingyou 1     | 庆油 1 号  | QY 1    | Semi-winter | Chongqing Zhongyi Industry.                        |
| V22 | Tianyouza 283 | 天油杂 283 | TYZ 283 | Semi-winter | Wuhan Wuda Tainyuan Biological Technology Co. Ltd. |
| V23 | Ganza 1       | 甘杂 1 号  | GZ 1    | Semi-winter | Northwest Agricultural & Forestry University.      |
| V24 | Fengyou 520   | 沔油 520  | FY 520  | Semi-winter | Hunan Crop Research Institute.                     |

---

**Table S2:** Germination and seedling's traits description and abbreviations under control and polyethylene glycol 6000 (PEG-6000) drought treatments and the drought tolerance indices (DTIs) used to evaluate traits response to drought treatments.

| Name                                            | Abbreviation | Description                                                                                                                                                       |
|-------------------------------------------------|--------------|-------------------------------------------------------------------------------------------------------------------------------------------------------------------|
| Final germination %                             | FG%          | Calculated as $FG\% = n / N \times 100$<br>where n is the number of germinated seeds (radicle length approximately 2 mm) and N is the total number of sown seeds. |
| Shoot length                                    | ShL          | The maximum length of the shoot is measured from the point of attachment (cm).                                                                                    |
| Root length                                     | RL           | The maximum length of fresh roots measured from the point of attachment (cm).                                                                                     |
| Shoot fresh weight                              | ShFW         | Weight of fresh shoot detached from the grain and immediately weighed in grams.                                                                                   |
| Root fresh weight                               | RFW          | The fresh weight of roots of each plant separated from the seed and was immediately weighed in grams.                                                             |
| Shoot dry weight                                | ShDW         | Weight of dried fresh shoot put in kraft bag and dried in the oven at $75 \pm 5$ C until constant weight in grams.                                                |
| Root dry weight                                 | RDW          | Weight of dried fresh roots put in kraft bag, dried in the oven at $75 \pm 5$ C until constant weight in grams.                                                   |
| Drought tolerance index (Final germination DTI) | DTI (FG%)    | $FG\% \text{ under PEG drought} / FG\% \text{ under control} \times 100$<br>FG-DTI10%, and FG-DTI15%                                                              |
| Shoot length drought tolerance index            | ShL-DTI      | $ShL \text{ under PEG drought} / SL \text{ under control} \times 100$<br>ShL-DTI10% and ShL-DTI15%                                                                |
| Shoot fresh weight tolerance index              | ShFW-DTI     | $ShFW \text{ under PEG drought} / ShFW \text{ under control} \times 100$<br>ShFW-DTI10% and ShFW-DTI15%                                                           |
| Shoot dry weight drought tolerance index        | ShDW-DTI     | $SDW \text{ under PEG drought} / SDW \text{ under control} \times 100$<br>ShDW-DTI10% and ShDW-DTI15%                                                             |
| Root length drought tolerance index             | RL-DTI       | $RL \text{ under PEG drought} / RL \text{ under control} \times 100$<br>RL-DTI10% and RL- RL-DTI15%                                                               |
| Root fresh weight drought tolerance index       | RFW-DTI      | $RFW \text{ under PEG drought} / RFW \text{ under control} \times 100$<br>RFW-DTI10% and RFW-DTI15%                                                               |
| Root dry weight drought tolerance index         | RDW-DTI      | $RDW \text{ under PEG drought} / RDW \text{ under control} \times 100$<br>RDW-DTI10% and RDW-DTI15%                                                               |

**Table S3:** Final germination percentage of three cultivars to select the concentration of PEG-6000.

| <b>Treatment</b>         | <b>YYZ 3</b>        | <b>XZY 518</b>      | <b>GZ 1</b>          |
|--------------------------|---------------------|---------------------|----------------------|
| <b>CK</b>                | 99.44 <sup>a</sup>  | 99.44 <sup>a</sup>  | 93.88 <sup>bcd</sup> |
| <b>PEG-5%</b>            | 99.44 <sup>a</sup>  | 98.33 <sup>ab</sup> | 95.00 <sup>abc</sup> |
| <b>PEG-10%</b>           | 98.88 <sup>a</sup>  | 99.44 <sup>a</sup>  | 93.88 <sup>bcd</sup> |
| <b>PEG-15%</b>           | 99.44 <sup>ab</sup> | 91.11 <sup>cd</sup> | 90.00 <sup>ced</sup> |
| <b>PEG-20%</b>           | 85.55 <sup>ef</sup> | 88.88 <sup>de</sup> | 80.55 <sup>f</sup>   |
| <b>PEG-25%</b>           | 8.888 <sup>g</sup>  | 20.00 <sup>g</sup>  | 24.44 <sup>g</sup>   |
| <b>Treatment</b>         |                     | <b>**</b>           |                      |
| <b>Variety</b>           |                     | <b>**</b>           |                      |
| <b>Treatment×Variety</b> |                     | <b>ns</b>           |                      |

Data are presented as mean values with different letters, which denote statistically significant differences between means within each indicator column among cultivars according to Fisher's least significant difference (LSD) test. \*\* showed significant difference at  $P \leq 0.05$  and ns is denoting non-significant interaction..
