# Supplementary material for: Rapeseed Morpho-Physio-Biochemical Responses to Drought Stress Induced by PEG-6000
Source: MDPI journal article supplement (doi:10.3390/agronomy12030579), 2022-02-26
Supplement: s1 [file s1]

Archive with 1 entries (1 files):
- agronomy-1577379-supplementary.pdf
